# Supplementary material for: Development of a Mucoadhesive Vehicle Based on Lyophilized Liposomes for Drug Delivery through the Sublingual Mucosa
Source: MDPI journal article supplement (doi:10.3390/pharmaceutics14071497), 2022-07-19
Supplement: s1 [file s1]

Batch: 2111221512\_Lote1

Start: 22/11/2021 15:13:06

End: 25/11/2021 17:02:44

User:: ma

User group:: Maintenance

Computer:: LYOSUITELAB

Recipe Recetaparaprotocolo1

Version: 1

Saved on: 22/11/2021 15:07:19

Saved by: ma

Comment: Receta para Protocolo 1

| Step | Process               | Temperature (°C) | Vacuum (µbar a) | HH | HM | Temperature limit | Transition by product temperature | Vacuum limit | Safety cooling | Pressure rise test | Vacuum control |
|------|-----------------------|------------------|-----------------|----|----|-------------------|-----------------------------------|--------------|----------------|--------------------|----------------|
| 1    | Shelves temperature   | 10.0             |                 |    |    |                   |                                   |              |                |                    |                |
| 2    | Freezing              | 10.0             |                 | 0  | 30 |                   |                                   |              |                |                    |                |
| 3    | Freezing              | -60.0            |                 | 1  | 0  | ✓                 |                                   |              |                |                    |                |
| 4    | Freezing              | -60.0            |                 | 3  | 0  |                   |                                   |              |                |                    |                |
| 5    | Freezing              | -30.0            |                 | 0  | 20 | ✓                 |                                   |              |                |                    |                |
| 6    | Condenser preparation |                  |                 | 0  | 10 |                   |                                   |              |                |                    |                |
| 7    | Chamber vacuum        |                  | 100             |    |    |                   |                                   |              |                |                    |                |
| 8    | Primary drying        | -30.0            | 100             | 0  | 20 |                   |                                   |              |                |                    |                |
| 9    | Primary drying        | -30.0            | 100             | 24 | 0  |                   |                                   |              |                | ✓                  |                |
| 10   | Secondary drying      | 10.0             | 0               | 0  | 20 | ✓                 |                                   |              |                |                    |                |
| 11   | Secondary drying      | 10.0             | 0               | 12 | 0  |                   |                                   |              |                | ✓                  |                |
| 12   | Secondary drying      | 18.0             | 0               | 0  | 5  | ✓                 |                                   |              |                |                    |                |
| 13   | Secondary drying      | 18.0             | 0               | 6  | 0  |                   |                                   |              |                | ✓                  |                |
| 14   | End of cycle          |                  |                 |    |    |                   |                                   |              |                |                    |                |
| 15   |                       |                  |                 |    |    |                   |                                   |              |                |                    |                |
| 16   |                       |                  |                 |    |    |                   |                                   |              |                |                    |                |
| 17   |                       |                  |                 |    |    |                   |                                   |              |                |                    |                |
| 18   |                       |                  |                 |    |    |                   |                                   |              |                |                    |                |

**Figure S1.** Recipe for cycle 1 used for the ramp temperature approach.

Batch: 2201131225\_13enero2022

Start: 13/01/2022 12:25:18

End: 18/01/2022 11:37:31

User:: ma

User group:: Maintenance

Computer:: LYOSUITELAB

Recipe riskedcycle

Version: 1

Saved on: 13/01/2022 12:22:07

Saved by: ma

Comment: Receta para Protocolo 1

| Step | Process               | Temperature (°C) | Vacuum (µbar a) | HH | HH | Temperature limit | Transition by product temperature | Vacuum limit | Safety cooling | Pressure rise test | Vacuum control |
|------|-----------------------|------------------|-----------------|----|----|-------------------|-----------------------------------|--------------|----------------|--------------------|----------------|
| 1    | Shelves temperature   | 5.0              |                 |    |    |                   |                                   |              |                |                    |                |
| 2    | Freezing              | 5.0              |                 | 0  | 30 |                   |                                   |              |                |                    |                |
| 3    | Freezing              | -45.0            |                 | 1  | 0  | ✓                 |                                   |              |                |                    |                |
| 4    | Freezing              | -45.0            |                 | 3  | 0  |                   |                                   |              |                |                    |                |
| 5    | Freezing              | -25.0            |                 | 0  | 20 | ✓                 |                                   |              |                |                    |                |
| 6    | Condenser preparation |                  |                 | 0  | 10 |                   |                                   |              |                |                    |                |
| 7    | Chamber vacuum        |                  | 100             |    |    |                   |                                   |              |                |                    |                |
| 8    | Primary drying        | -25.0            | 100             | 0  | 20 | ✓                 |                                   |              |                |                    |                |
| 9    | Primary drying        | -25.0            | 100             | 4  | 0  |                   |                                   |              |                |                    |                |
| 10   | Primary drying        | -22.0            | 25              | 0  | 10 | ✓                 |                                   |              |                |                    |                |
| 11   | Primary drying        | -22.0            | 25              | 4  | 0  |                   |                                   |              |                |                    |                |
| 12   | Primary drying        | -20.0            | 25              | 0  | 10 | ✓                 |                                   |              |                |                    |                |
| 13   | Primary drying        | -20.0            | 25              | 4  | 0  |                   |                                   |              |                |                    |                |
| 14   | Primary drying        | -17.0            | 25              | 0  | 10 | ✓                 |                                   |              |                |                    |                |
| 15   | Primary drying        | -17.0            | 25              | 4  | 0  |                   |                                   |              |                |                    |                |
| 16   | Primary drying        | -15.0            | 25              | 0  | 10 | ✓                 |                                   |              |                |                    |                |
| 17   | Primary drying        | -17.0            | 25              | 4  | 0  |                   |                                   |              |                | ✓                  |                |
| 18   | Secondary drying      | 15.0             | 0               | 0  | 20 | ✓                 |                                   |              |                |                    |                |

**Figure S2.** Recipe for cycle 2 used for the ramp temperature approach.

Batch: 2203081732\_lotecompletode

Start: 08/03/2022 17:32:57

End: 10/03/2022 20:37:14

User:: ma

User group:: Maintenance

Computer:: LYOSUITELAB

Recipe mucoadhesivosbucales

Version: 7

Saved on: 08/03/2022 16:01:49

Saved by: ma

Comment: receta pra mucoadhesivos bucales

| Step | Process               | Temperature (°C) | Vacuum (µbar a) | NH | MM | Temperature limit | Transition by product temperature | Vacuum limit | Safety cooling | Pressure rise test | Vacuum control |
|------|-----------------------|------------------|-----------------|----|----|-------------------|-----------------------------------|--------------|----------------|--------------------|----------------|
| 1    | Shelves temperature   | 5.0              |                 |    |    |                   |                                   |              |                |                    |                |
| 2    | Freezing              | 5.0              |                 | 0  | 30 |                   |                                   |              |                |                    |                |
| 3    | Freezing              | -40.0            |                 | 1  | 0  | ✓                 |                                   |              |                |                    |                |
| 4    | Freezing              | -40.0            |                 | 4  | 0  |                   |                                   |              |                |                    |                |
| 5    | Freezing              | -20.0            |                 | 0  | 20 | ✓                 |                                   |              |                |                    |                |
| 6    | Condenser preparation |                  |                 | 0  | 10 |                   |                                   |              |                |                    |                |
| 7    | Chamber vacuum        |                  | 100             |    |    |                   |                                   |              |                |                    |                |
| 8    | Primary drying        | -20.0            | 100             | 2  | 0  |                   |                                   |              |                |                    |                |
| 9    | Primary drying        | -17.0            | 100             | 0  | 20 | ✓                 |                                   |              |                |                    |                |
| 10   | Primary drying        | -17.0            | 0               | 24 | 0  |                   |                                   |              |                |                    |                |
| 11   | Secondary drying      | 17.0             | 0               | 0  | 20 | ✓                 |                                   |              |                |                    |                |
| 12   | Secondary drying      | 17.0             | 0               | 18 | 0  |                   |                                   |              |                |                    |                |
| 13   | End of cycle          |                  |                 |    |    |                   |                                   |              |                |                    |                |
| 14   |                       |                  |                 |    |    |                   |                                   |              |                |                    |                |
| 15   |                       |                  |                 |    |    |                   |                                   |              |                |                    |                |
| 16   |                       |                  |                 |    |    |                   |                                   |              |                |                    |                |
| 17   |                       |                  |                 |    |    |                   |                                   |              |                |                    |                |
| 18   |                       |                  |                 |    |    |                   |                                   |              |                |                    |                |

**Figure S3.** Recipe for cycle 3 used for the ramp temperature approach.

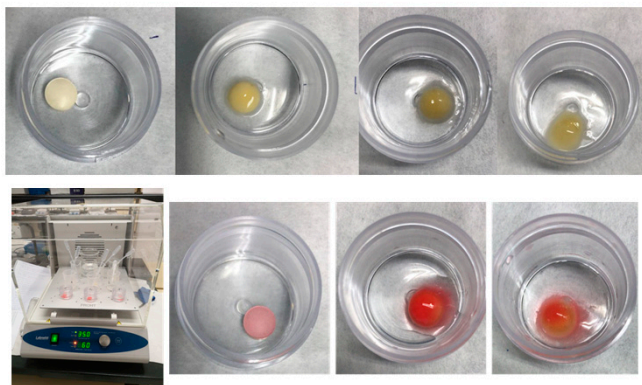

**Figure S4.** Tablets' aspect during swelling assay.

**Table S1.** Result from the palatability assay in healthy volunteers.

| Formulation     | Lip+L+A | Lip+L+C | Lip+L+A+C | Lip+L+M+A | Lip+L+M+C | Lip+L+M+A+C |
|-----------------|---------|---------|-----------|-----------|-----------|-------------|
| Smell           | 3.2     | 3.3     | 2.5       | 2         | 3.7       | 3.7         |
| Flavor          | 3.8     | 4.3     | 3.9       | 3.3       | 3.8       | 3.8         |
| Texture         | 3.4     | 1.6     | 4.1       | 2.3       | 2.3       | 2.4         |
| General feeling | 3.2     | 3.3     | 3.9       | 2.7       | 2.8       | 3.3         |
| Mean            | 3.4     | 3.1     | 3.6       | 2.6       | 3.2       | 3.3         |
| S.D.            | 0.3     | 1.1     | 0.7       | 0.6       | 0.7       | 0.6         |

**Table S2.** Results from the in vivo assay performed to evaluate the sublingual suitability of tablets.

|              | Capsule-shaped tablets |                                               |                     | Round tablets      |                                           |                     |
|--------------|------------------------|-----------------------------------------------|---------------------|--------------------|-------------------------------------------|---------------------|
| Participants | Adhesion time/ min     | Adhesion Strength                             | Signs of irritation | Adhesion time/ min | Adhesion Strength                         | Signs of irritation |
| 1            | 15                     | Non-adhesive/ Slightly adhesive when finished | non-irritating      | 52                 | Adhesive                                  | non-irritating      |
| 2            | 26                     | Adhesive                                      | non-irritating      | 50                 | Slightly adhesive/ Adhesive when finished | non-irritating      |
| 3            | 24                     | Slightly adhesive                             | non-irritating      | 50                 | Adhesive                                  | non-irritating      |
| 4            | 30                     | Adhesive                                      | non-irritating      | 40                 | Slightly adhesive                         | non-irritating      |
| 5            | 24                     | Slightly adhesive                             | non-irritating      | 35                 | Adhesive                                  | non-irritating      |
| 6            | 34                     | Non-adhesive/ Slightly adhesive when finished | non-irritating      | 40                 | Adhesive                                  | non-irritating      |
| Mean±S.D.    | 25.50±6.44             |                                               |                     | 45.40±7.47         |                                           |                     |
